# Supplementary material for: Investigation of apoptosis based on fluorescence lifetime imaging microscopy with a mitochondria-targeted viscosity probe
Source: Royal Society of Chemistry journal article supplement (doi:10.1039/d1ra06697h), 2021-01-01
Supplement: d1ra06697h1.pdf [file d1ra06697h1.pdf]

**Table S1 Viscosity of water/glycerol system**

| water/glycerol (v:v) | $\eta$ (cP) |
|----------------------|-------------|
| 100:0                | 1.03        |
| 50:50                | 5.42        |
| 40:60                | 10.41       |
| 30:70                | 27.81       |
| 20:80                | 57.61       |
| 15:85                | 126.05      |
| 10:90                | 177.63      |
| 8:92                 | 337.50      |
| 6:94                 | 458.43      |
| 2:98                 | 721.28      |
| 0:100                | 952.88      |

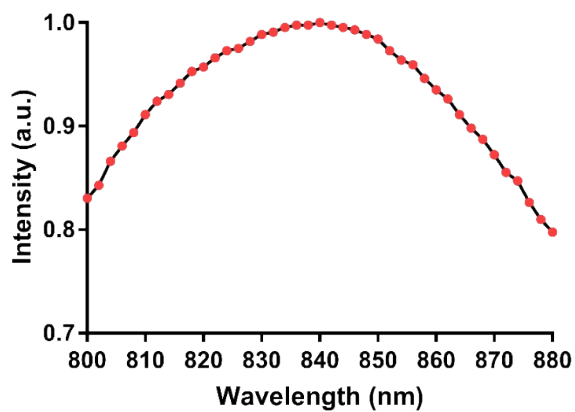

Fig. S1. The two-photon absorptivity of femtosecond laser with different central wavelengths of TPA-Mit. The excitation efficiency of TPA-Mit researched to the highest when the excitation wavelength was 840 nm.

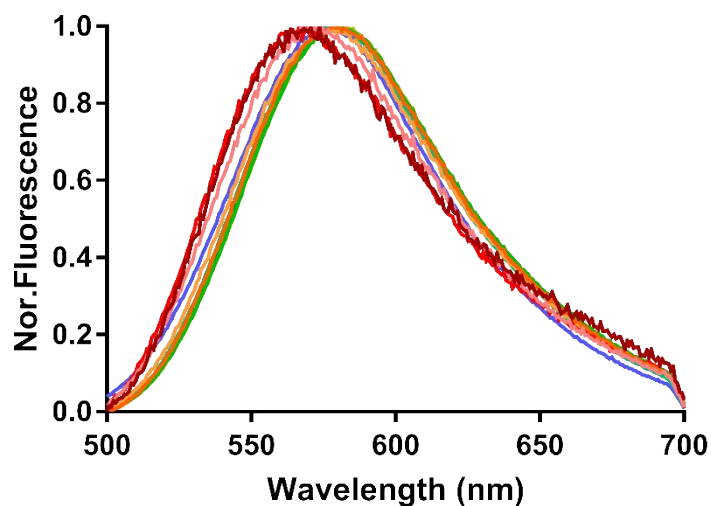

Fig. S2. Fluorescence emission normalised spectra of TPA-Mit under different solution viscosities in the water/glycerol system ( $\lambda_{ex} = 840$  nm,  $\lambda_{em} = 580$  nm).

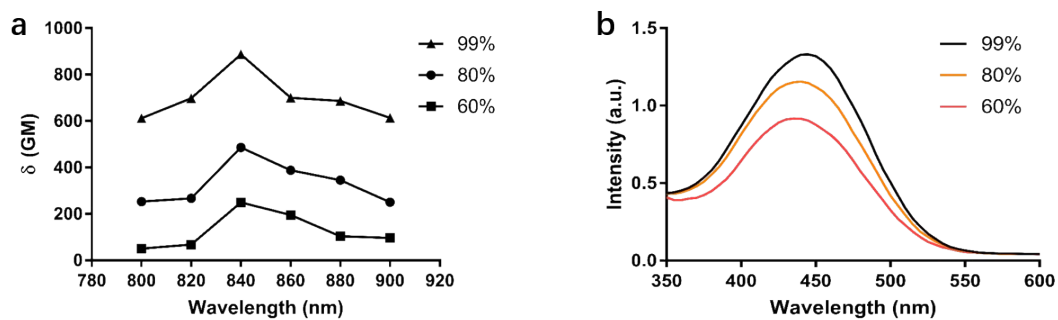

Fig. S3. (a) Two-photon absorption cross-section of TPA-Mit under different solution viscosities in the water/glycerol system. (b) Absorption spectra of TPA-Mit under different viscosities

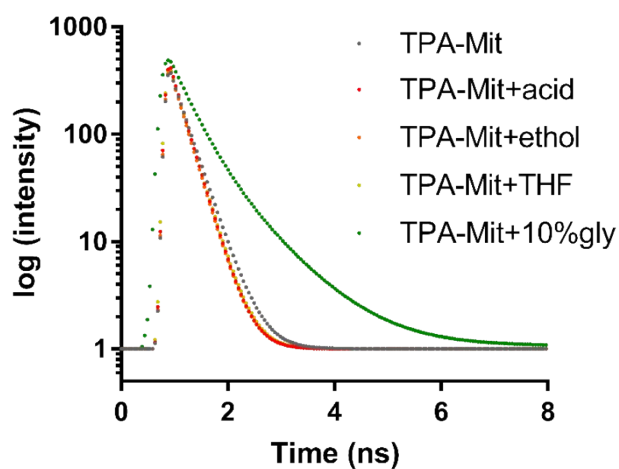

Fig. S4. Fluorescence lifetime of TPA-Mit in different solution environments.

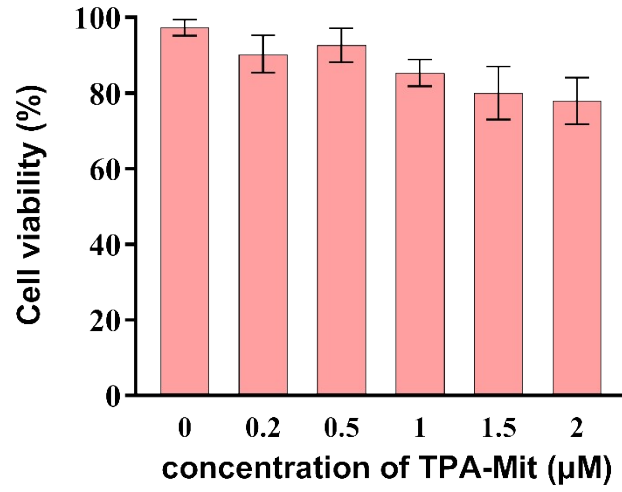

Fig. S5. Viability of SKOV-3 cells after incubation for 24h with TPA-Mit (0  $\mu\text{M}$ , 0.2  $\mu\text{M}$ , 0.5  $\mu\text{M}$ , 1  $\mu\text{M}$ , 1.5  $\mu\text{M}$ , 2  $\mu\text{M}$ ).

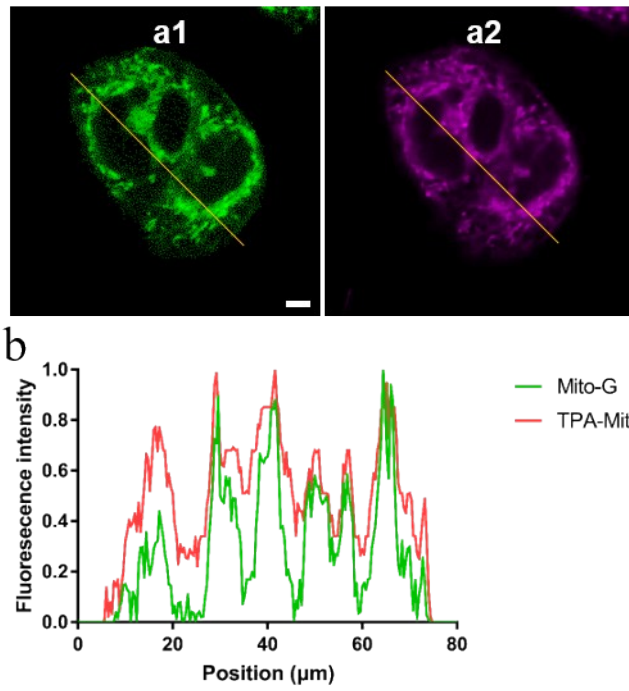

Fig. S6. The cross section through the image

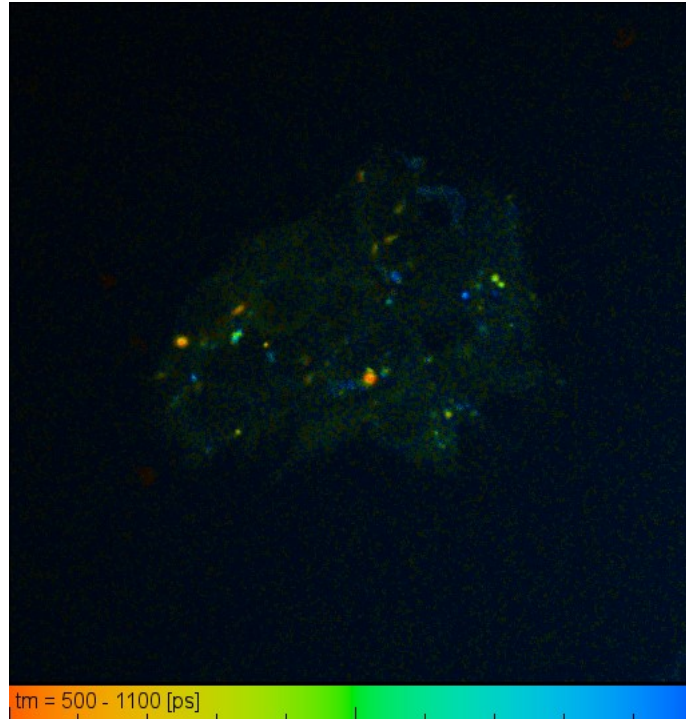

Fig. S7. Fluorescence lifetime image of cellular autofluorescence. excitation power to about 10 mW after imaging objective.

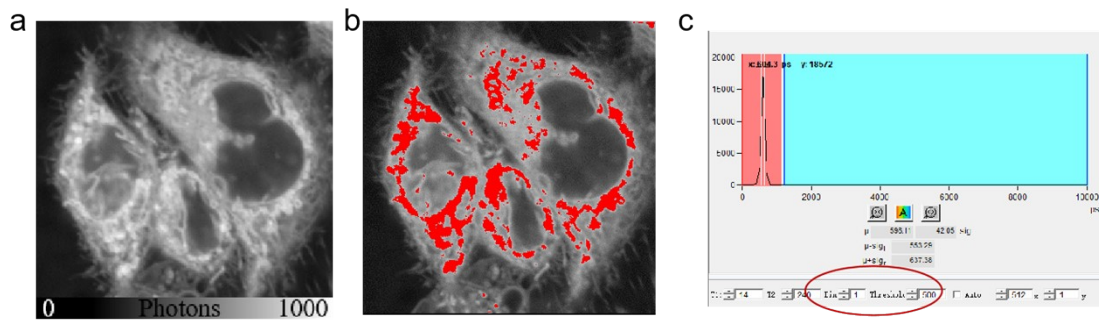

Fig. S8. Section selection based on the threshold of photon count. a. Photon count of SKOV-3 stained by TPA-Mit ( $0.2 \mu\text{M}$ ). b. Section separation result when the threshold was set 500 photons ( $>500$  photons for the red region). c. User interface of the *SPC image* (Becker & Hickl GmbH, Germany).

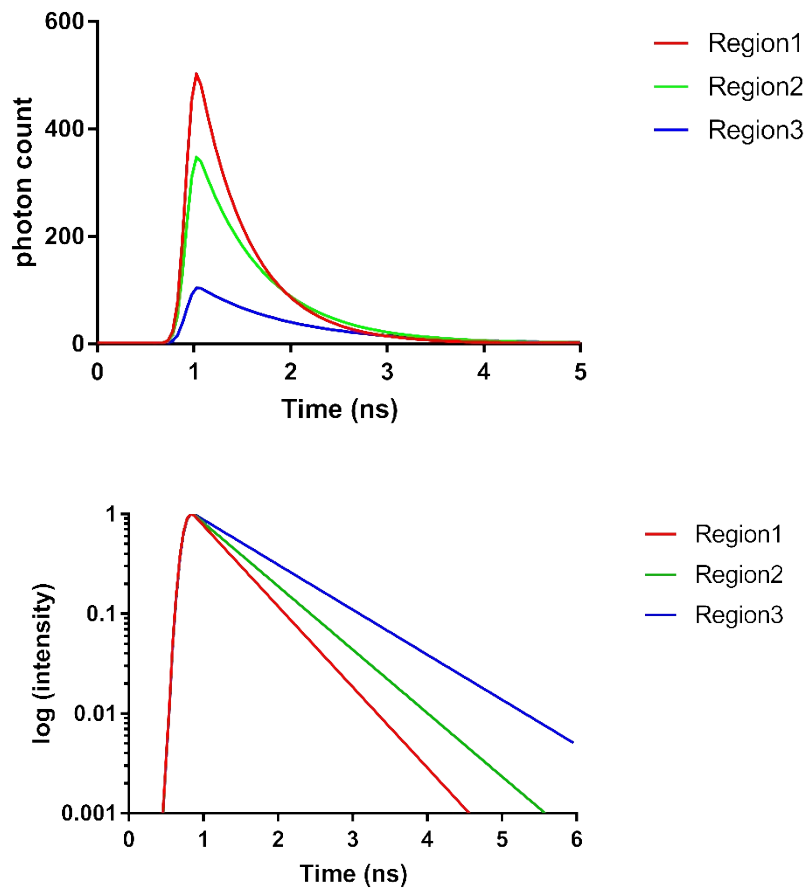

Fig. S9. The representative decays in three regions

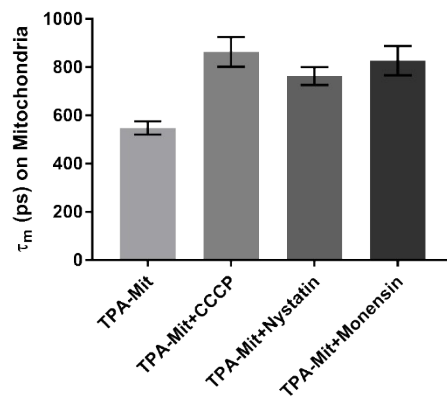

Fig. S10. Fluorescence lifetime change of TPA-Mit after the stained SKOV-3 cells were treated with Carbonyl cyanide 3-chlorophenylhydrazone (CCCP, 2  $\mu$ M), Monensin (10  $\mu$ M) and Nystatin (10  $\mu$ M) for 24h.
